# Supplementary material for: TtCel7A: A Native Thermophilic Bifunctional Cellulose/Xylanase Exogluclanase from the Thermophilic Biomass-Degrading Fungus Thielavia terrestris Co3Bag1, and Its Application in Enzymatic Hydrolysis of Agroindustrial Derivatives
Source: MDPI journal article supplement (doi:10.3390/jof9020152), 2023-01-23
Supplement: s1 [file s1]

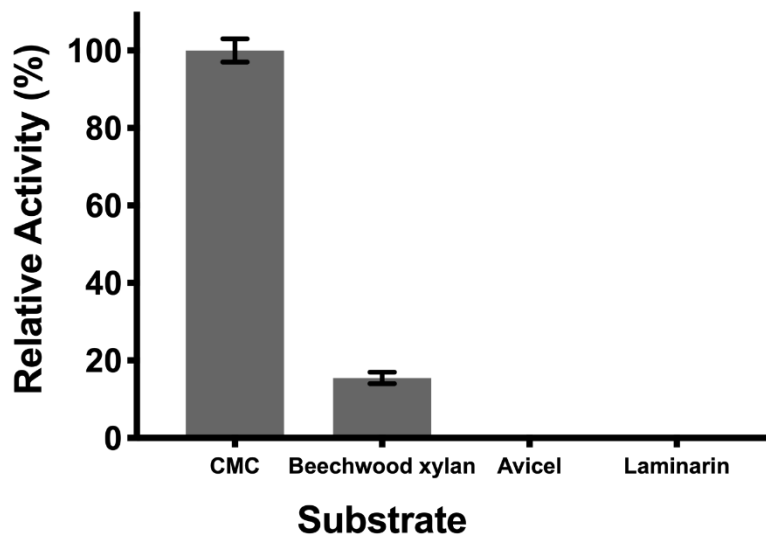

**Figure.S1.** Effect of substrate on the activity of purified TtCel7A. The activity was assayed using CMC, Beechwood xylan, Avicel, or Laminarin at a final concentration of 0.6 % (w/v) in 50 mM acetate buffer, pH 5.5 at 60 °C.

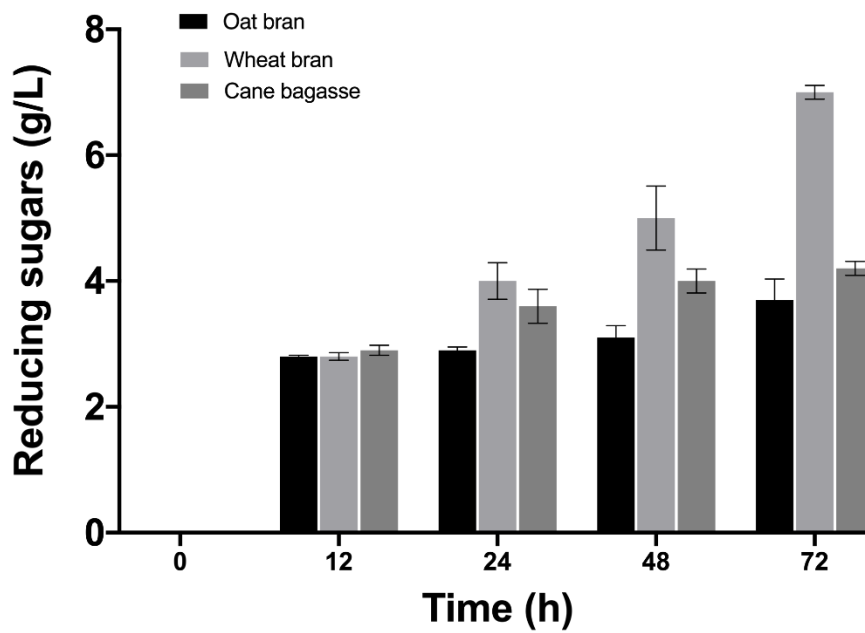

**Figure. S2.** Reducing sugars released from Oat bran, Wheat bran, or Cane bagasse after incubation with purified TtCel7A (30 mg/mL).

MHAKFATLAALVASAAAQQACTLTAENHPTLSWSKCTSGGSCTSVSGAVTIDANWRWTHQVSSSTNCYTG  
 NEWDTSICTDGASCAAACCLDGADYSGTYGITTSGNALSLQFVTQGPYSTNIGSRTYLMASDTQYQTFTL  
 LGNEFTFDVDVSGGLGCGNLGALYFVSMADGGLSKYSGNKAGAKYGTGYCDSQCPRDLKFINGEANNVGW  
TPSSNDKNAGLGNYGSCCSEMDVWEANSISAAYTPHPCTTIGQTRCEGDACGGTYSTDYYAGECDPDGCD  
FNSYRMGNTTFYGKGLTVDTSKKFTVVTQFLTDSSGNLSEIKRFYVQNGVVIPNSNSNIAGVSGNSITQA  
FCDAQKTAFGDTNVFDQKGGLAQMGKALAQPMVLVMSLWDDHAVNMLWLDSTYPTDAAGKPGAARGTCPT  
TSGVPADVESQAPNSKVIYSNIRFGPIGSTVSGLPGGGSNPGGSSSTTTTRTSTTTTRTTSSSAGTSPTG  
 GTAPHWGQCGGIGWTGPTVCASPYTCQKLNDWYYQCL

**Figure. S3.** Amino acid sequence of TtCel7A from *T. terrestris* Co3Bag1 (Accession number: AQM74408). Peptides obtained by amino acid partial sequencing of purified TtCel7A by MS/MS are highlighted in blue. The amino acid sequence used for primer design are underline.

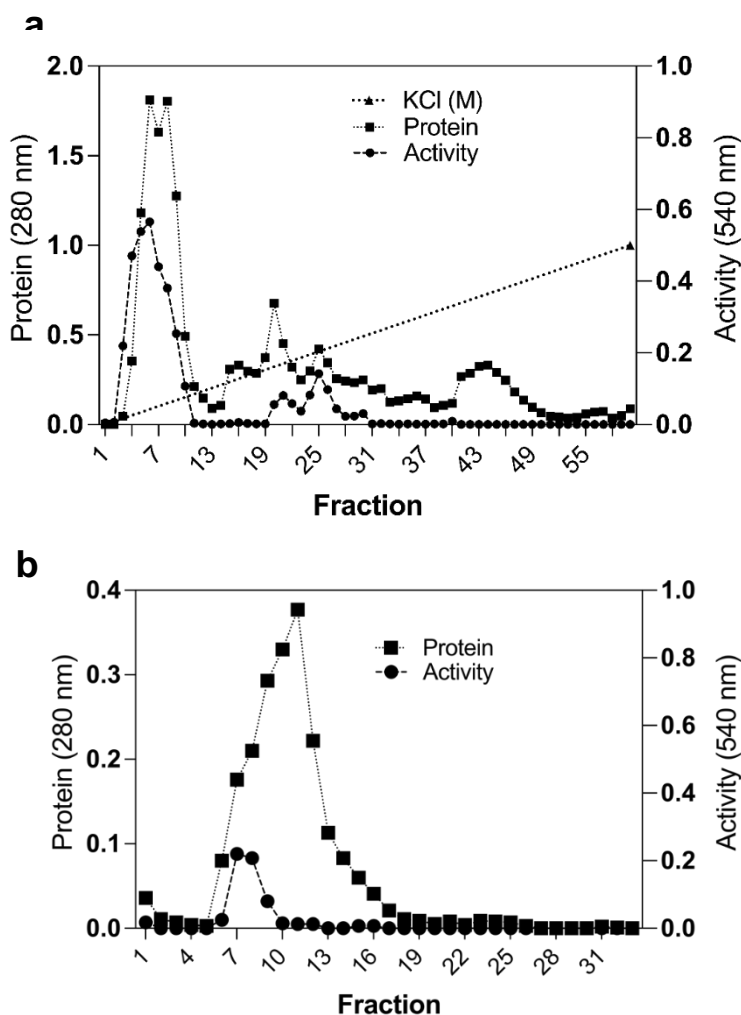

**Figure. S4.** (a) Anion Exchange Chromatography of Cel7A purification. A gradient of 0.0 to 1M of KCl was used for protein elution. Fractions between 19 and 31 section were pooled for the next purification step. (b) Gel filtration Chromatography purification, 50 mM acetate buffer, pH 5.5 was used for protein elution, fractions with enzymatic activity were used for further studies. (■) protein 280 nm, (●) enzyme activity 540 nm, (▲) KCl concentration.

**Table S1.** Primers used for DNA sequencing of Ttcel7A gene

|                                              |
|----------------------------------------------|
| <b>Primer 1:</b> 5'-GACCCTCGCCGCCCTTGTGG-3'  |
| <b>Primer 2:</b> 5'-SRCYCTCGCCGCCCTYGTGG-3   |
| <b>Primer 3:</b> 5'-TGCGACCCTGACGGATGCGAC-3' |
| <b>Primer 4:</b> 5'-TGCGACCCYGAYGGMTGCGAC-3' |
| <b>Primer 5:</b> 5'-GAGGCACTGGTAGTACCAGTC-3' |
